# Supplementary material for: Morphology-controlled synthesis of cage-bell Pd@CeO2 structured nanoparticle aggregates as catalysts for the low-temperature oxidation of CO
Source: Royal Society of Chemistry journal article supplement (doi:10.1039/c3ta10643h), 2013-01-01
Supplement: c3ta10643h.pdf [file c3ta10643h.pdf]

## Electronic Supplementary Information

XRD of the resulting graphitize carbon (Fig. S1), SEM image of the resulting carbon (Fig. S2).

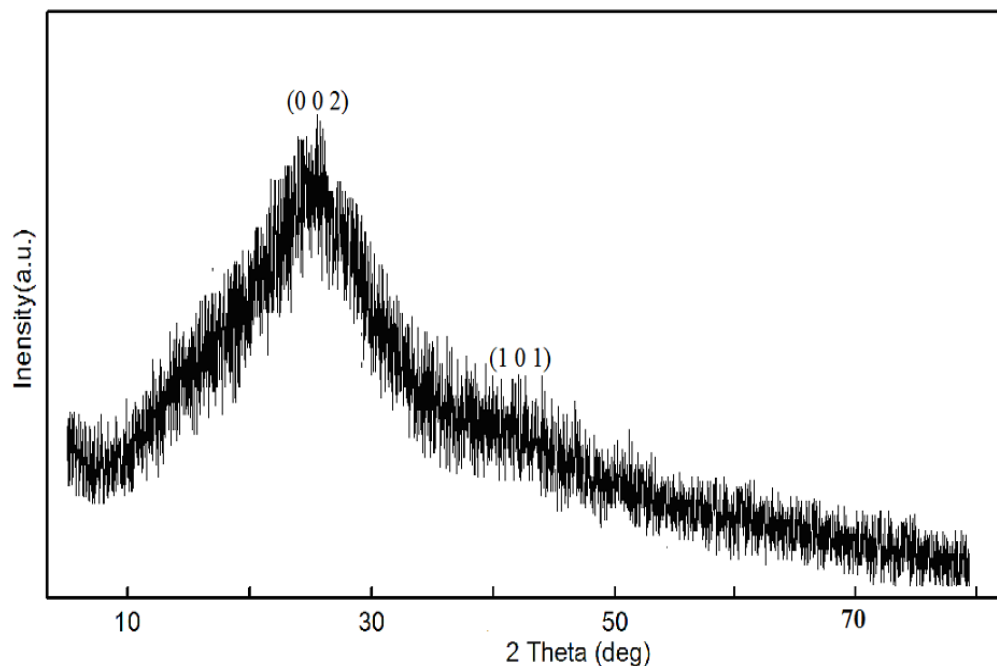

5 Fig. S1. XRD of the resulting graphitize carbon after composites of  $\text{H}_2\text{SO}_4$  and  $\text{H}_2\text{O}_2$  are hired to remove the  $\text{CeO}_2$ .

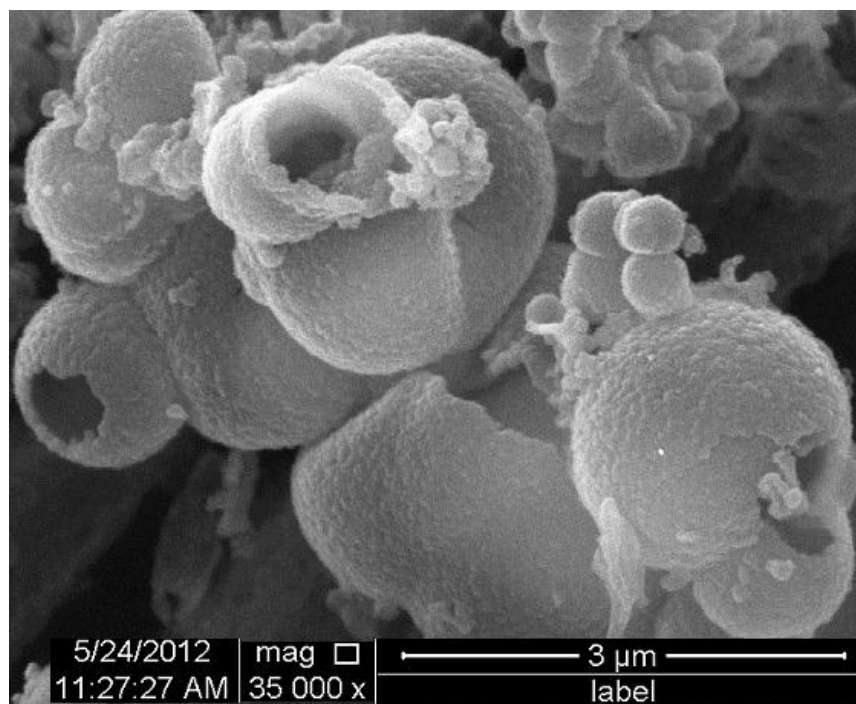

10

Fig. S2. SEM image of the resulting graphitize carbon after composites of  $\text{H}_2\text{SO}_4$  and  $\text{H}_2\text{O}_2$  are hired to remove the  $\text{CeO}_2$ .
